# Supplementary material for: Massive and rapid COVID-19 testing is feasible by extraction-free SARS-CoV-2 RT-PCR
Source: PubMed Central journal article supplement (PMC7511968; doi:10.1038/s41467-020-18611-5), 2020-09-23
Supplement: 41467_2020_18611_MOESM1_ESM.pdf [file 41467_2020_18611_MOESM1_ESM.pdf]

## SUPPLEMENTARY INFORMATION

# Massive and rapid COVID-19 testing is feasible by extraction-free SARS-CoV-2 RT-PCR

Ioanna Smyrlaki<sup>1,\*</sup>, Martin Ekman<sup>2,\*</sup>, Antonio Lentini<sup>1</sup>, Nuno Rufino de Sousa<sup>3</sup>, Natali Papanicolaou<sup>1</sup>, Martin Vondracek<sup>2</sup>, Johan Aarum<sup>2</sup>, Hamzah Safari<sup>2</sup>, Shaman Muradrasoli<sup>4</sup>, Antonio Gigliotti Rothfuchs<sup>3</sup>, Jan Albert<sup>2,3</sup>, Björn Högberg<sup>1</sup> and Björn Reinius<sup>1,#</sup>

<sup>1</sup> Department of Medical Biochemistry and Biophysics, Karolinska Institutet, Stockholm, Sweden.

<sup>2</sup> Department of Clinical Microbiology, Karolinska University Hospital, Stockholm, Sweden.

<sup>3</sup> Department of Microbiology, Tumor and Cell Biology, Karolinska Institutet, Stockholm, Sweden.

<sup>4</sup> Public Health Agency of Sweden, Solna, Sweden.

\* Equal contribution

# Correspondence to [bjorn.reinius@ki.se](mailto:bjorn.reinius@ki.se)

Supplementary Figures 1-2  
Supplementary Tables 1-3

# Supplementary figure 1

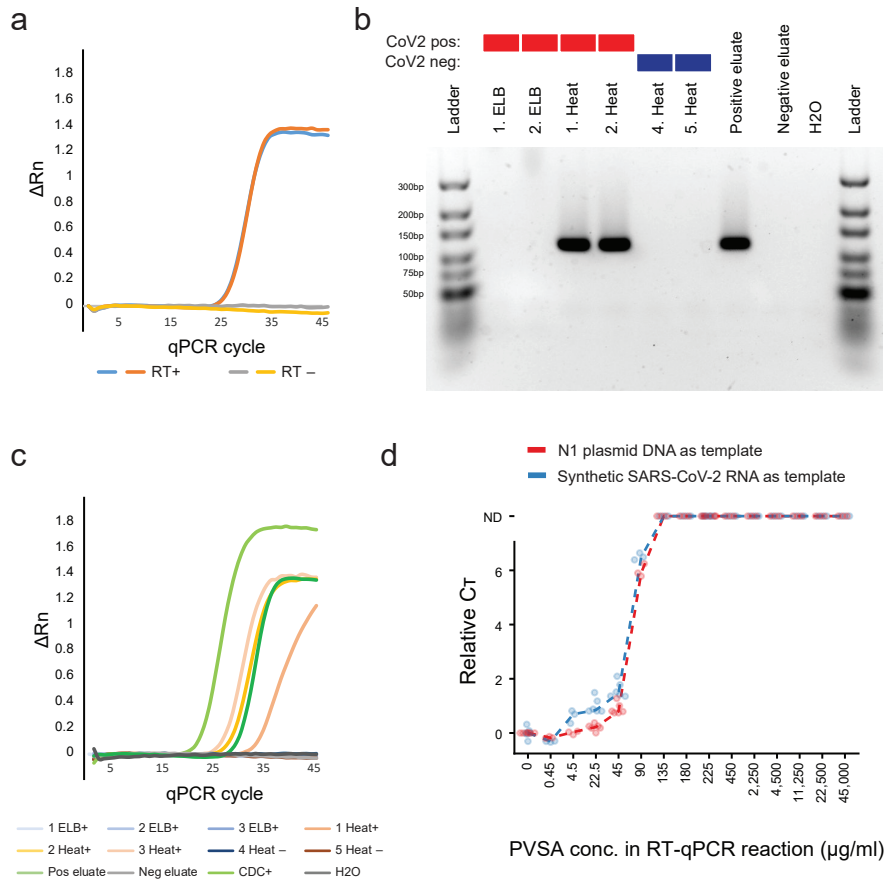

**Supplementary figure 1.** (a) Amplification plots showing normalized reporter value ( $\Delta R_n$ , linear scale) as a function of qPCR cycle for two-step RT and qPCR performed on synthetic full-genome SARS-CoV-2 RNA (SKU102024-MN908947.3, Twist Biosciences) including (RT+) or excluding (RT-) the reverse transcriptase. (b) Agarose gel electrophoresis of RT-PCR products for reactions described in Fig.2e, but in this case using primers and probes for gene E. (c) Amplification plots showing normalized reporter value ( $\Delta R_n$ , linear scale) as a function of qPCR cycle for the samples described in Fig. 2e-f, but using two-step RT and qPCR instead of the single-step TaqPath RT-qPCR (Methods). (d) Relative cycle threshold ( $C_T$ ) values of SARS-CoV-2 RT-PCR using the N1 primer-probe set and a dilution series of the chemical RNase inhibitor polyvinylsulfonic acid (PVSA). To test the inhibition of PVSA in RT and PCR reactions separately, we used either synthetic full-genome SARS-CoV-2 RNA (blue dots and line) or plasmid DNA (CDC positive control) (red dots and line) as template in the RT-PCR reaction.  $C_T$  values are shown relative to reactions without PVSA (conc.= 0). The lines indicate the median of triplicate measurements.

## Supplementary figure 2

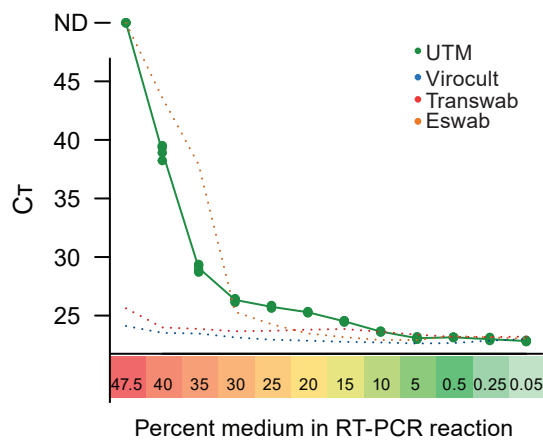

**Supplementary figure 2.**  $C_T$  values from RT-PCR performed on dilution series of Universal Transport Medium (UTM, Copan) using 50,000 spiked copies of synthetic full-genome SARS-CoV-2 RNA and the N1 primer-probe set. Lines represent the mean and the values of individually replicates ( $n=4$ ) are shown as dots. Mean values for Virocult, Transwab and Eswab are shown as dashed lines, included for comparison.



Supplementary table 2

**Supplementary table 2.** Limit-of-detection data. C<sub>T</sub> values for a COVID-19 positive clinical nasopharyngeal swab sample diluted 1:100, 1:1000, 1:10,000 or 1:100,000 in PBS and quantified using cobas 6800 and TaqPath SARS-CoV-2 RT-PCR on eluted RNA.

| Sample dilution | Replicate | cobas 6800 | RT-PCR (eluate) | cobas 6800 | RT-PCR (eluate) |
|-----------------|-----------|------------|-----------------|------------|-----------------|
|                 |           | E          | E               | ORF1       | RdRP            |
| 1:100           | 1         | 35.16      | 34.98           | 35.14      | 33.18           |
|                 | 2         | 34.97      | ND              | 34.95      | 33.89           |
|                 | 3         | 35.26      | 32.86           | 34.60      | 32.92           |
| 1:1000          | 1         | 37.35      | 36.53           | 36.32      | 33.90           |
|                 | 2         | 36.25      | 35.36           | 36.06      | 34.55           |
|                 | 3         | 36.68      | ND              | 35.88      | 35.36           |
| 1:10,000        | 1         | 37.91      | 35.31           | 37.05      | 35.55           |
|                 | 2         | 38.71      | ND              | ND         | ND              |
|                 | 3         | 39.09      | ND              | ND         | ND              |
| 1:100,000       | 1         | ND         | ND              | ND         | ND              |
|                 | 2         | ND         | ND              | ND         | ND              |
|                 | 3         | ND         | ND              | ND         | ND              |

### Supplementary table 3

**Supplementary table 3.** Generic buffers evaluated for SARS-CoV-2 hid-RT-PCR.

| Buffer                           | Composition                                                        | Measured pH | Company catalog number (if available) |
|----------------------------------|--------------------------------------------------------------------|-------------|---------------------------------------|
| PVSA in H <sub>2</sub> O pH6.5   | Polyvinylsulfonic acid in H <sub>2</sub> O (50µg/ml)               | 6.5         | Sigma 278424, Ambion AM9932           |
| TE + 4% sucrose pH7.0            | TE (10 mM Tris; 0.1mM EDTA) + 4% sucrose                           | 7.0         | Invitrogen AM9858                     |
| Tris buffer 10mM pH7.0           | 10mM Tris buffer                                                   | 7.0         |                                       |
| PVSA in Tris buffer pH7.0        | PVSA in 10mM Tris buffer (50µg/ml PVSA)                            | 7.0         |                                       |
| Tris-HCl 5mM pH7.4               | Tris-HCl 5mM                                                       | 7.4         |                                       |
| TE pH7.0                         | TE (10 mM Tris + 0.1mM EDTA)                                       | 7.0         | Invitrogen AM9858                     |
| PBS 10mM pH7.5                   | 10mM PBS                                                           | 7.5         | Invitrogen AM9624                     |
| Sodium citrate 1mM pH7.6         | 1mM Sodium citrate                                                 | 7.6         |                                       |
| H <sub>2</sub> O                 | H <sub>2</sub> O                                                   | 6.4         | Ambion AM9932                         |
| PVSA in 1mM Sodium citrate pH7.5 | PVSA in 1mM Sodium citrate (50µg/ml PVSA)                          | 7.5         |                                       |
| TE + 4% sucrose pH8.0            | TE (10 mM Tris; 0.1mM EDTA) + 4% sucrose)                          | 8.0         | Invitrogen AM9858                     |
| TE pH8.1                         | TE (10 mM Tris 0.1mM EDTA)                                         | 8.1         | Invitrogen AM9858                     |
| HBSS pH8.4                       | HBSS (Hanks' Balanced Salt solution)                               | 8.4         | Gibco 14025-092                       |
| PBS 100mM pH7.7                  | 100mM PBS                                                          | 7.7         | Invitrogen AM9624                     |
| Saline 0.9% pH5.8                | 0.9% NaCl in 1L water                                              | 5.8         |                                       |
| DMEM pH7.9                       | DMEM (Dulbecco's Modified Eagle Medium)                            | 7.9         | Sigma D5796                           |
| Citrate buffer pH6.2             | Citrate buffer (0.04M Sodium citrate dihydrate; 0.06M Citric acid) | 6.2         |                                       |
